# Supplementary material for: Diamond@carbon-onion hybrid nanostructure as a highly promising electrocatalyst for the oxygen reduction reaction
Source: Royal Society of Chemistry journal article supplement (doi:10.1039/c5ra28066d), 2016-01-01
Supplement: c5ra28066d1.pdf [file c5ra28066d1.pdf]

## Electronic Supplementary Information

### **Diamond@Carbon-onion Hybrid Nanostructure as a Highly Potential Electrocatalyst in Oxygen Reduction Reaction**

Jaekang Koh,<sup>a</sup> Sung Hyeon Park,<sup>b</sup> Min Wook Chung,<sup>a</sup> Seung Yong Lee,<sup>a</sup> and Seong Ihl Woo<sup>a,b\*</sup>

<sup>a</sup> *Graduate School of EEWS, Korea Advanced Institute of Science and Technology, Daejeon 34141,  
Republic of Korea.*

<sup>b</sup> *Department of Chemical and Biomolecular Engineering, Korea Advanced Institute of Science and  
Technology, Daejeon 34141, Republic of Korea.*

\* *Corresponding author, Tel: +82-42-350-3918, Fax: +82-42-350-3910,*

*E-mail address: [siwoo@kaist.ac.kr](mailto:siwoo@kaist.ac.kr)*

## Supporting Information

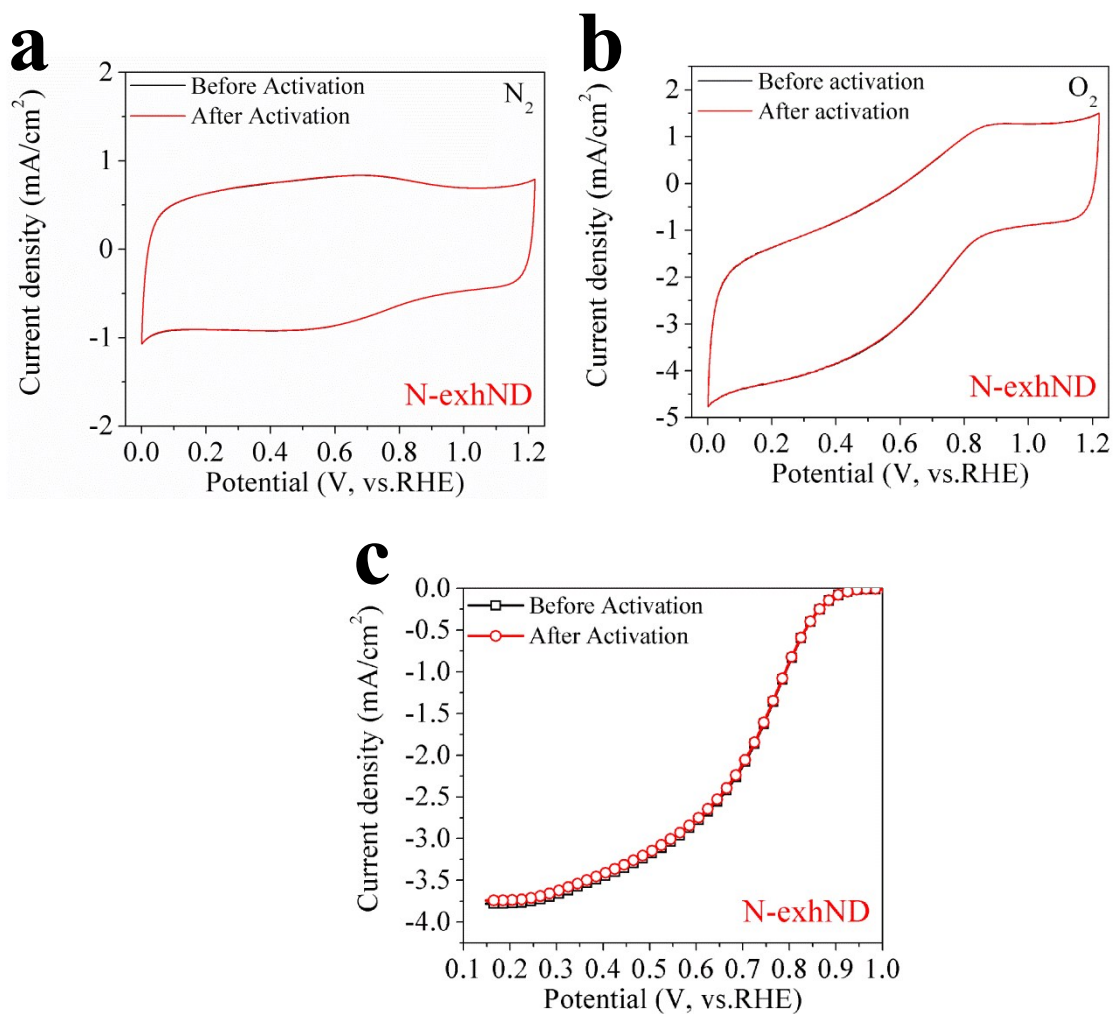

**Fig. S1** Electrochemical results for before and after activation process. a) CV in  $\text{N}_2$ -purged b) CV in  $\text{O}_2$ -purged and c) ORR performance of N-exhND catalyst in 0.1 M  $\text{HClO}_4$ .

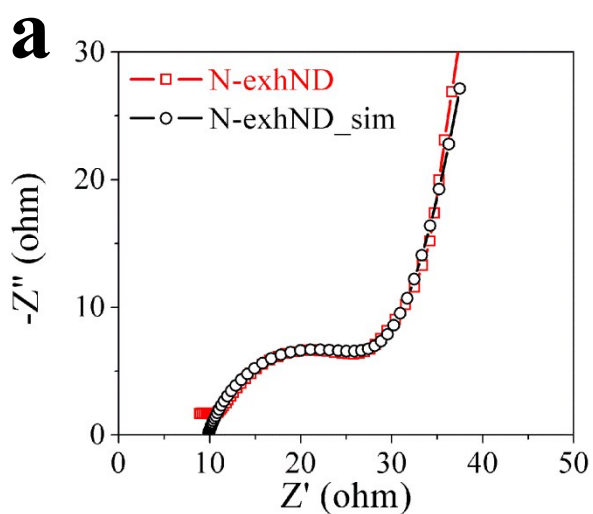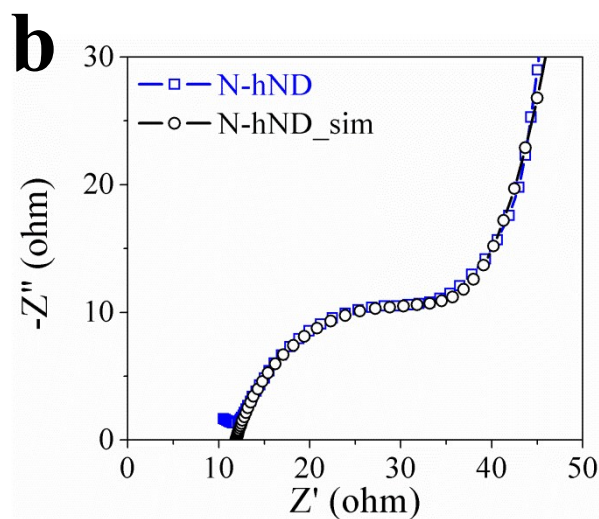

**c**

| Parameter                       | N-exhND  | N-hND    |
|---------------------------------|----------|----------|
| $R_s$ (ohm)                     | 9.80     | 11.9     |
| $R_{CT}$ (ohm)                  | 18.8     | 25.8     |
| Warburg (S-sec <sup>1/2</sup> ) | 0.0868   | 0.0860   |
| CPE (S-sec <sup>n</sup> )       | 0.002346 | 0.003015 |
| $C_L$ (farad)                   | 0.098    | 0.080    |

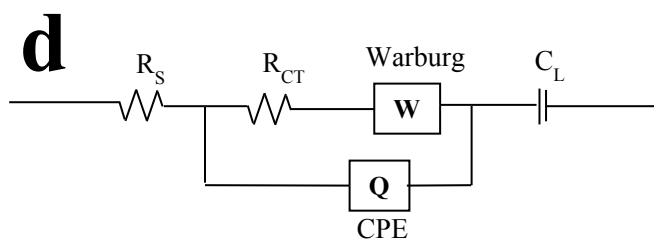

|          |                                |
|----------|--------------------------------|
| $R_s$    | Solution resistance            |
| $R_{CT}$ | Charge transfer resistance     |
| Warburg  | Warburg element                |
| CPE      | Constant phase element         |
| $C_L$    | Low frequency mass capacitance |

**Fig. S2** EIS measurement and their simulation for a) N-exhND, and b)N-hND. c) Obtained parameter values by the simulations, and d) electric circuit model.

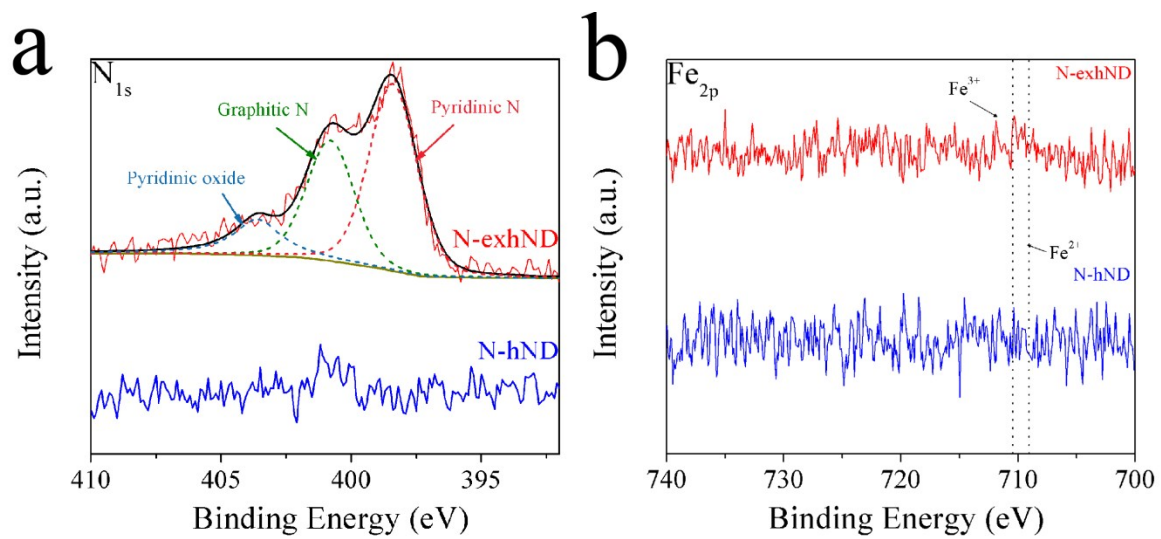

**Fig. S3** XPS results of a)  $N_{1s}$  b)  $Fe_{2p}$  of N-exhND and N-hND catalysts.

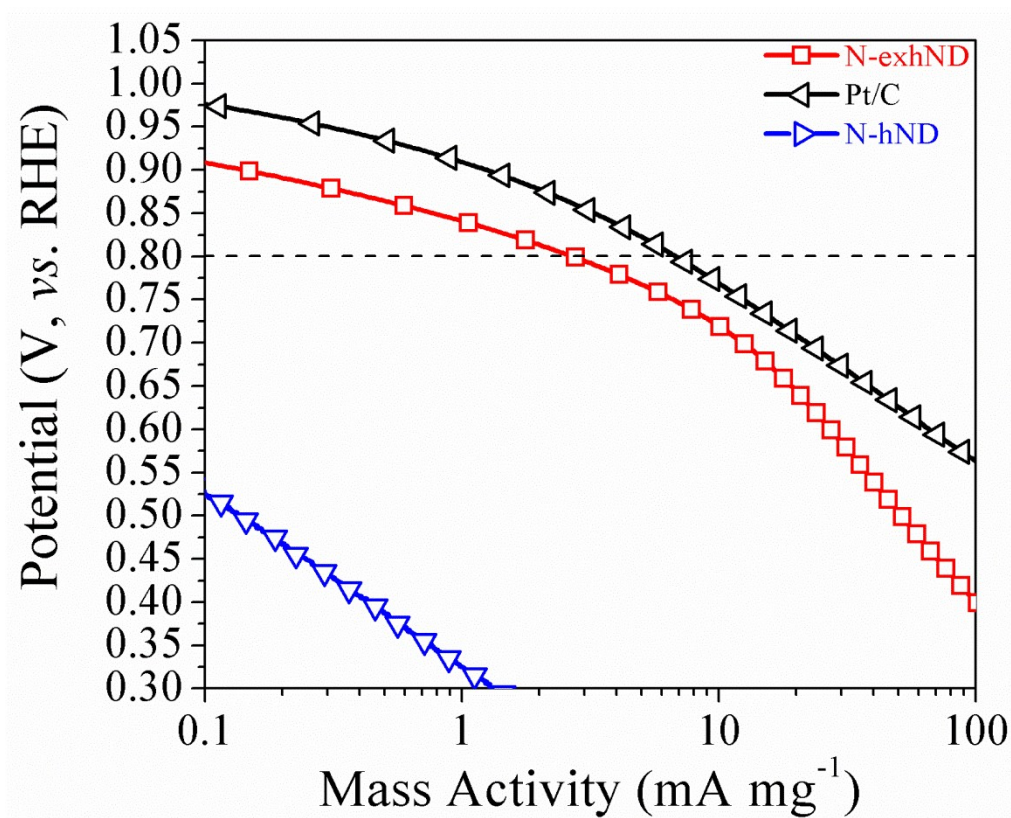

**Fig. S4** Tafel plots calculated from the ORR current densities of the prepared catalysts.

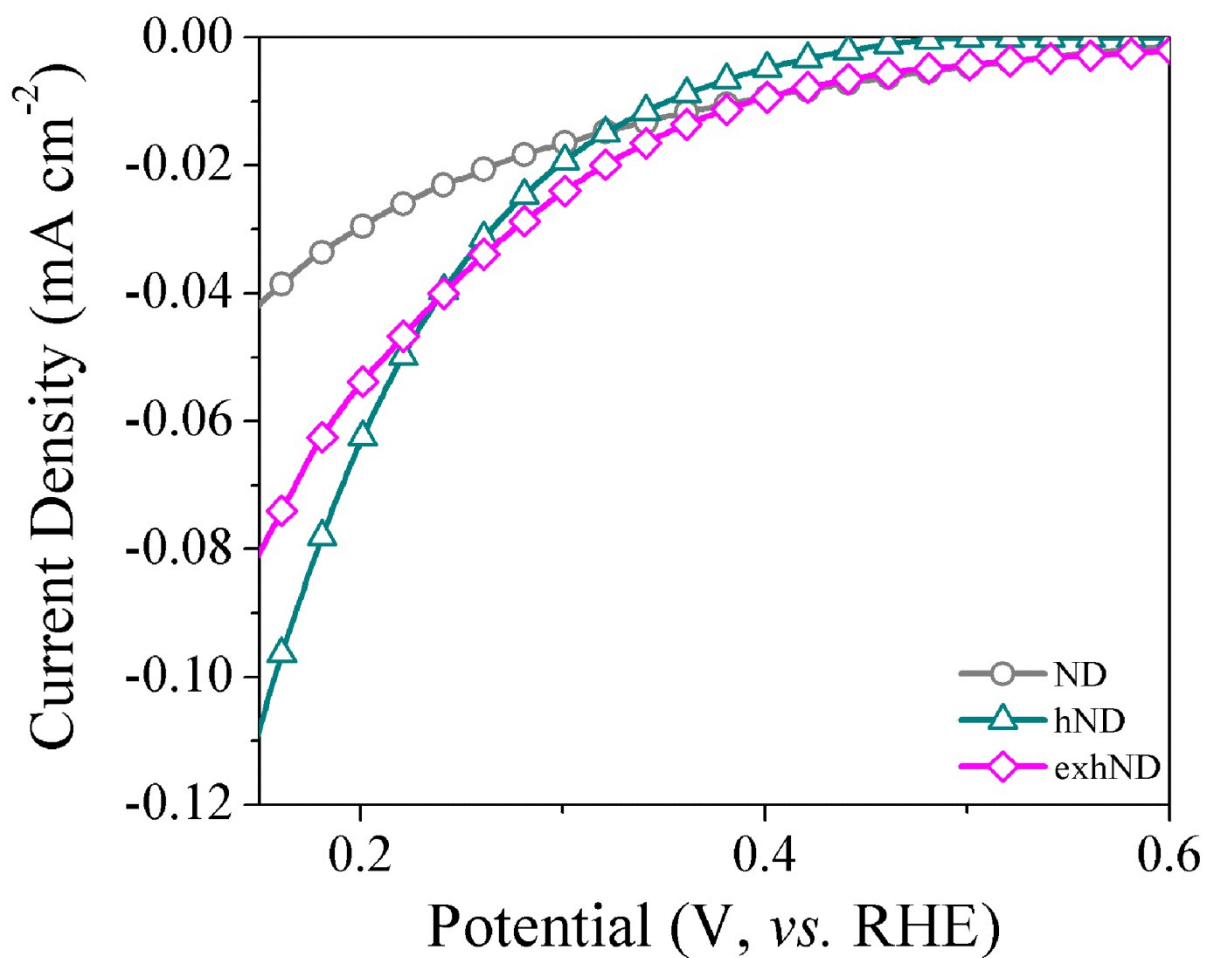

**Fig. S5** Electrochemical results of the prepared catalysts: LSV analysis in O<sub>2</sub>-purged 0.1 M HClO<sub>4</sub> at a scan rate of 5 mV s<sup>-1</sup>.

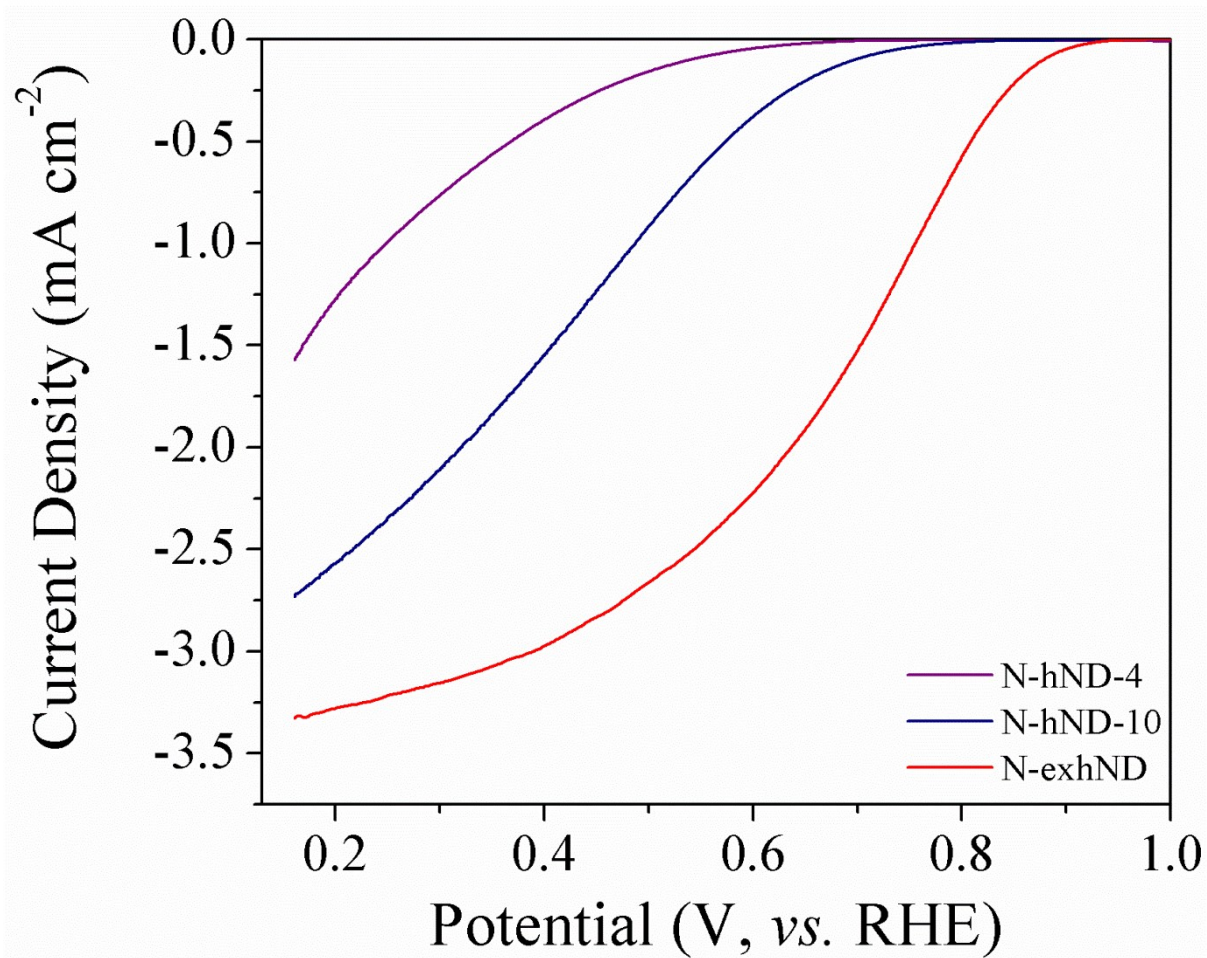

**Fig. S6** Electrochemical comparison of the N-hND-4 and N-hND-10 with N-exhND catalyst: LSV analysis in O<sub>2</sub>-purged 0.1 M HClO<sub>4</sub> at a scan rate of 5 mV s<sup>-1</sup>.

| Catalyst name | C <sup>1</sup> | O <sup>1</sup> | N <sup>1</sup> | H <sup>1</sup> | S <sup>1</sup> | Fe <sup>2</sup> | C <sup>3</sup> | O <sup>3</sup> | N <sup>3</sup> |
|---------------|----------------|----------------|----------------|----------------|----------------|-----------------|----------------|----------------|----------------|
| ND            | 84.63          | 2.38           | 1.81           | 11.17          | N/A            | 0.01            | 92.94          | 5.46           | 1.6            |
| hND           | 99.47          | 0.36           | 0.16           | N/A            | N/A            | 0.01            | 100            | N/A            | N/A            |
| exhND         | 82.86          | 9.88           | 0.22           | 6.90           | 0.13           | 0.01            | 84.17          | 15.09          | N/A            |
| N-exhND       | 91.74          | 1.27           | 1.92           | 4.35           | 0.05           | 0.67            | 87.85          | 4.02           | 7.32           |
| N-hND         | 99.18          | 0.24           | 0.46           | N/A            | N/A            | 0.12            | 100            | N/A            | N/A            |

*All values are in atomic %.*

<sup>1</sup>Results from an EA

<sup>2</sup>Results from an ICP analysis

<sup>3</sup>Results from an XPS analysis

**Table S1.** Compositions of the prepared catalysts from EA, ICP and XPS analysis.



| <b>Catalyst name</b> | <b>C</b> | <b>O</b> | <b>N</b> | <b>H</b> | <b>S</b> |
|----------------------|----------|----------|----------|----------|----------|
| N-exhND              | 91.74    | 1.27     | 1.92     | 4.35     | 0.05     |
| N-hND                | 99.18    | 0.24     | 0.46     | N/A      | N/A      |
| N-hND-4              | 98.16    | 0.46     | 0.71     | 0.64     | N/A      |
| N-hND-10             | 96.59    | 0.78     | 1.64     | 0.45     | N/A      |

*All values are in atomic %.*

**Table S2.** The elementary analysis of N-hND-4 and N-hND-10.

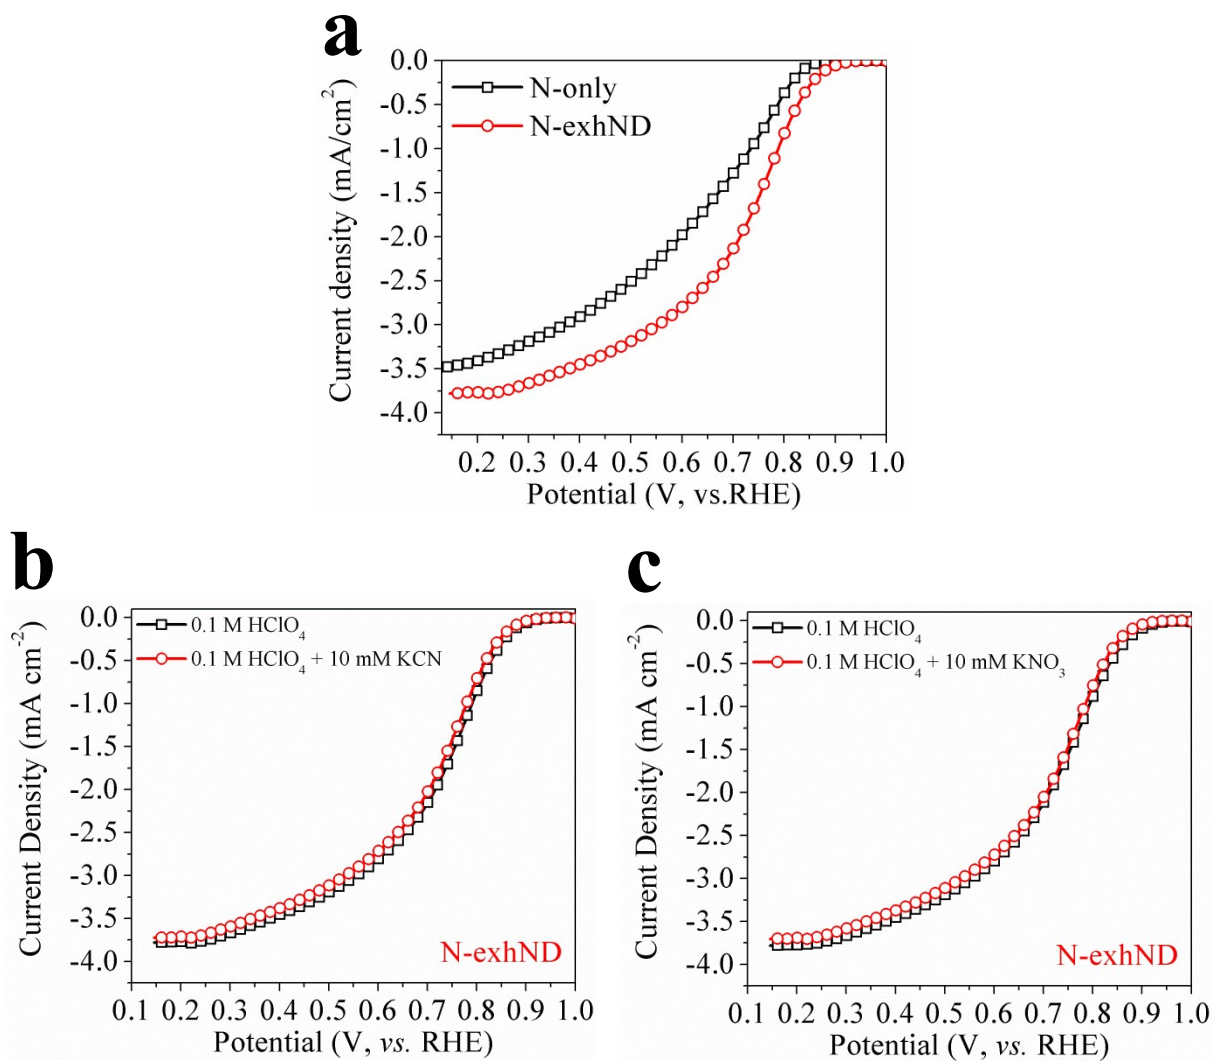

**Fig. S7** ORR performance of a) N-only catalyst in 0.1 M  $\text{HClO}_4$ , b) N-exhND in 10mM KCN containing 0.1 M  $\text{HClO}_4$ , c) N-exhND in 10mM  $\text{KNO}_3$  containing 0.1 M  $\text{HClO}_4$ .

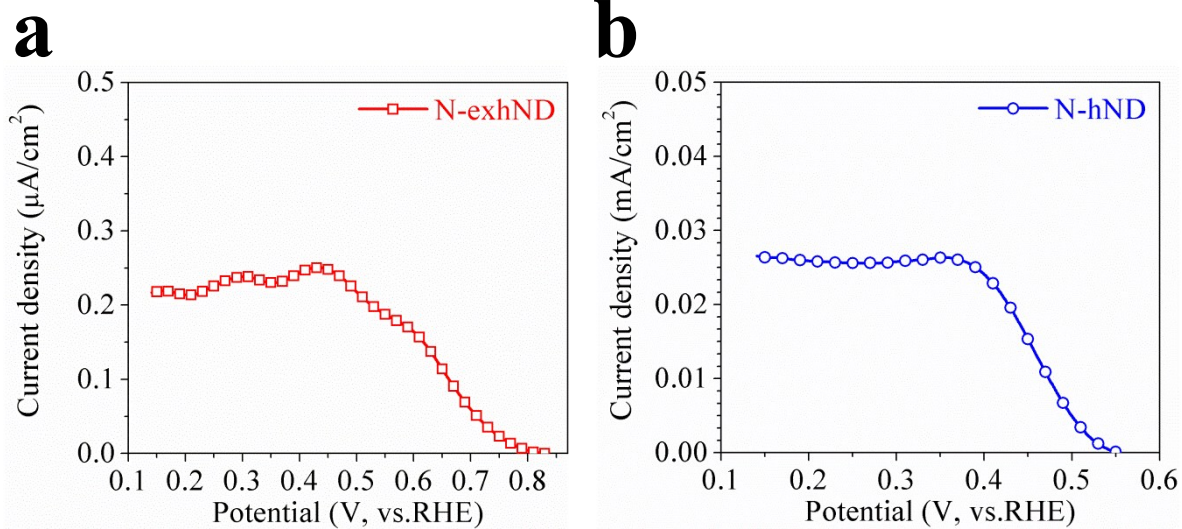

**Fig. S8** H<sub>2</sub>O<sub>2</sub> current densities from RRDE of a) N-exhND, and b) N-hND catalysts.

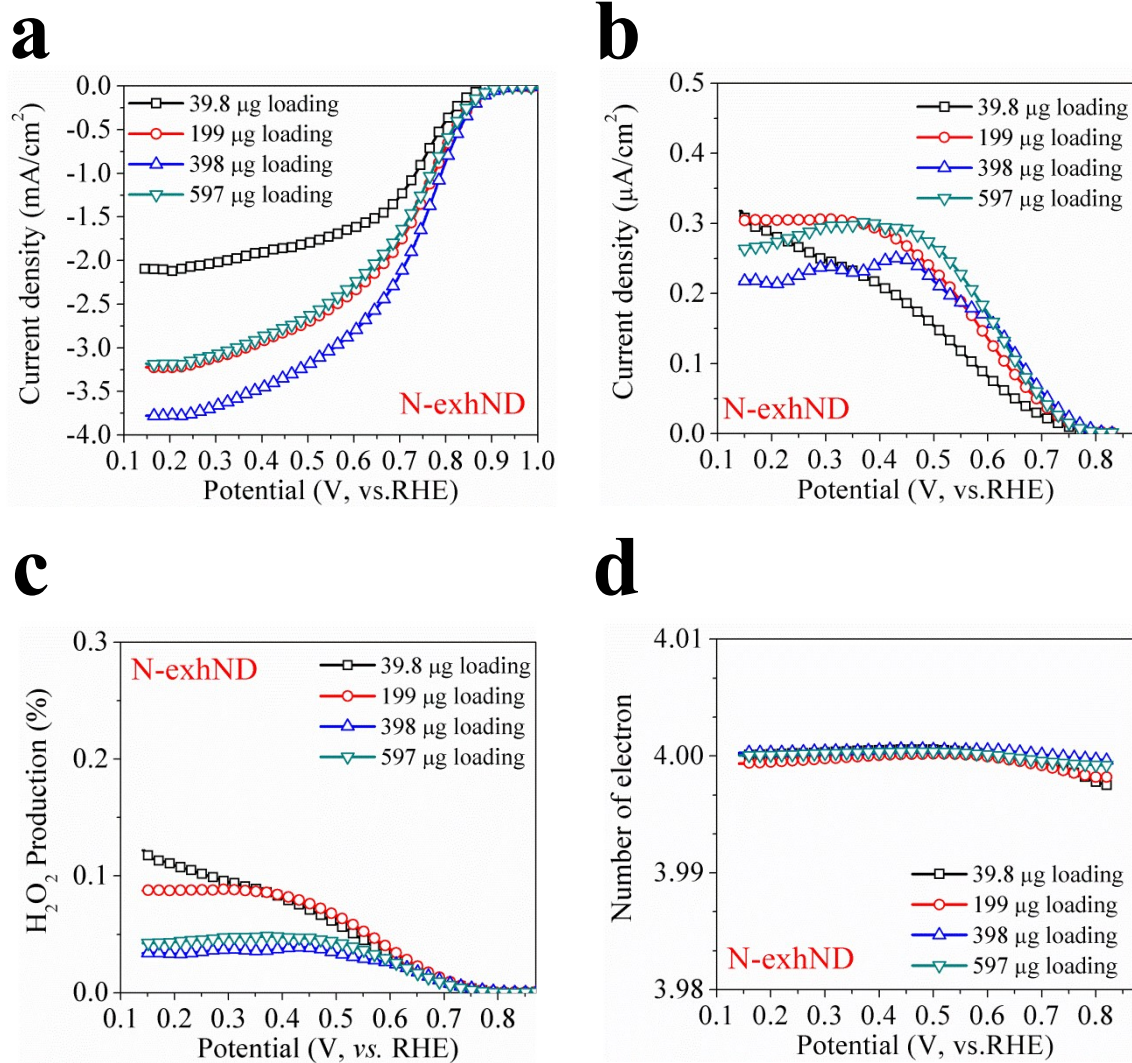

**Fig. S9** Effect of various loadings on ORR and H<sub>2</sub>O<sub>2</sub> production. a) LSV curves, b) H<sub>2</sub>O<sub>2</sub> RRDE current densities, c) H<sub>2</sub>O<sub>2</sub> production yield and d) number of electron transfer.

| Source                                | Electrolyte                          | Range V        | Scan Rate mV s <sup>-1</sup> | Cycles       | Loading mg cm <sup>-2</sup> | E <sub>1/2</sub> mV   |
|---------------------------------------|--------------------------------------|----------------|------------------------------|--------------|-----------------------------|-----------------------|
| <b>N-exhND (This Study)</b>           | <b>0.1 M HClO<sub>4</sub></b>        | <b>0.6-1.4</b> | <b>500</b>                   | <b>5,000</b> | <b>0.398</b>                | <b>31</b>             |
| Angew. Chem. Int. Ed. 2014, 53, 3675  | 0.1 M HClO <sub>4</sub>              | 0.6 – 1.0      | 10                           | 4,500        | 0.6                         | 22                    |
| Angew. Chem. Int. Ed. 2014, 53, 10673 | 0.5 M H <sub>2</sub> SO <sub>4</sub> | 0.6 – 1.0      | 10                           | 5,000        | 0.9                         | 79                    |
| J. Am. Chem. Soc. 2013, 135, 16002    | 0.1 M HClO <sub>4</sub>              | 0.6 – 1.0      | 50                           | 10,000       | 0.6                         | 9                     |
| J. Am. Chem. Soc. 2015, 137, 1436     | 0.5 M H <sub>2</sub> SO <sub>4</sub> | 0.364 - 0.964  | 50                           | 3,000        | 1.2                         | N/A                   |
| J. Mater. Chem. A, 2014, 2, 17047     | 0.5 M H <sub>2</sub> SO <sub>4</sub> | 0 – 1.04       | 50                           | 1,000        | 0.193                       | N/A (69.3% retention) |
| J. Mater. Chem. A, 2014, 2, 1242      | 0.1 M HClO <sub>4</sub>              | 0 – 1.0        | 100                          | 10,000       | 0.8                         | 24                    |
| J. Mater. Chem. A, 2015, 3, 3343      | 0.1 M HClO <sub>4</sub>              | 0.6 – 1.0      | 50                           | 5,000        | 0.485                       | 39                    |
| J. Mater. Chem. A, 2015, 3, 1752      | 0.1 M HClO <sub>4</sub>              | 0.6-1.0        | N/A                          | 2,000        | 0.6                         | 17                    |

**Table S3.** ADT conditions from previously reported studies.

| Source                                         | Type of material                            | Loading<br>mg cm <sup>-2</sup> | Onset<br>V        | Mass<br>activity<br>mA mg <sup>-1</sup> at<br>0.8 V | Electron<br>transfer |
|------------------------------------------------|---------------------------------------------|--------------------------------|-------------------|-----------------------------------------------------|----------------------|
| <b>N-exhND<br/>(This Study)</b>                | <b>Carbon<br/>Nano-<br/>onion</b>           | <b>0.398</b>                   | <b>0.91</b>       | <b>2.70</b>                                         | <b>4</b>             |
| Angew.<br>Chem. Int. Ed.<br>2014, 53,<br>3675  | Iron<br>Carbide<br>particles                | 0.6                            | 0.90              | 0.50 <sup>1</sup>                                   | 4                    |
| Angew.<br>Chem. Int. Ed.<br>2014, 53,<br>10673 | Fe-N<br>Complex                             | 0.9                            | 0.83              | -                                                   | 3.8                  |
| J. Am. Chem.<br>Soc. 2013,<br>135, 16002       | Ordered<br>mesoporous<br>Co-N<br>carbon     | 0.6                            | 0.91              | 0.43 <sup>1</sup>                                   | 3.8                  |
| J. Am. Chem.<br>Soc. 2015,<br>137, 1436        | Fe <sub>3</sub> C/CNT                       | 1.2                            | 0.89              | 0.36 <sup>1</sup>                                   | 4                    |
| J. Mater.<br>Chem. A,<br>2014, 2,<br>17047     | FeN <sub>4</sub> -doped<br>porous<br>carbon | 0.193                          | 0.90              | 1.94 <sup>1</sup>                                   | 3.9                  |
| J. Mater.<br>Chem. A,<br>2014, 2, 1242         | FeN <sub>x</sub> C/C                        | 0.8                            | 0.92              | 0.68 <sup>1</sup>                                   | 4                    |
| J. Mater.<br>Chem. A,<br>2015, 3, 3343         | N-doped<br>3D<br>graphene                   | 0.485                          | 0.83              | -                                                   | 4                    |
| J. Mater.<br>Chem. A,<br>2015, 3, 1752         | Fe <sub>3</sub> C                           | 0.6                            | 0.81 <sup>2</sup> | -                                                   | Mixed 2 and<br>4     |

<sup>1</sup> This value is not mentioned in the article but derived from LSV results at 0.8 V (vs. RHE)

**Table S4.** Comparison of ORR activity in acidic media from previously reported studies.
